# Supplementary material for: Remarkable static and dynamic nonlinear optical responses of Al13-TCNQ/F4-TCNQ complexes: a quantum chemical study
Source: Royal Society of Chemistry journal article supplement (doi:10.1039/d2nj04460a), 2022-01-01
Supplement: d2nj04460a1.pdf [file d2nj04460a1.pdf]

## Supporting Information

### **Remarkable static and dynamic nonlinear optical responses of Al<sub>13</sub>-TCNQ/F4-TCNQ complexes: A quantum chemical study**

Na Hou, Ting-Ting Liu and Xiao-Hui Fang

*Laboratory of Magnetic Molecules and Magnetic Information Materials (Ministry of Education), School of Chemistry and Material Science, Shanxi Normal University, Taiyuan, 030031, China*

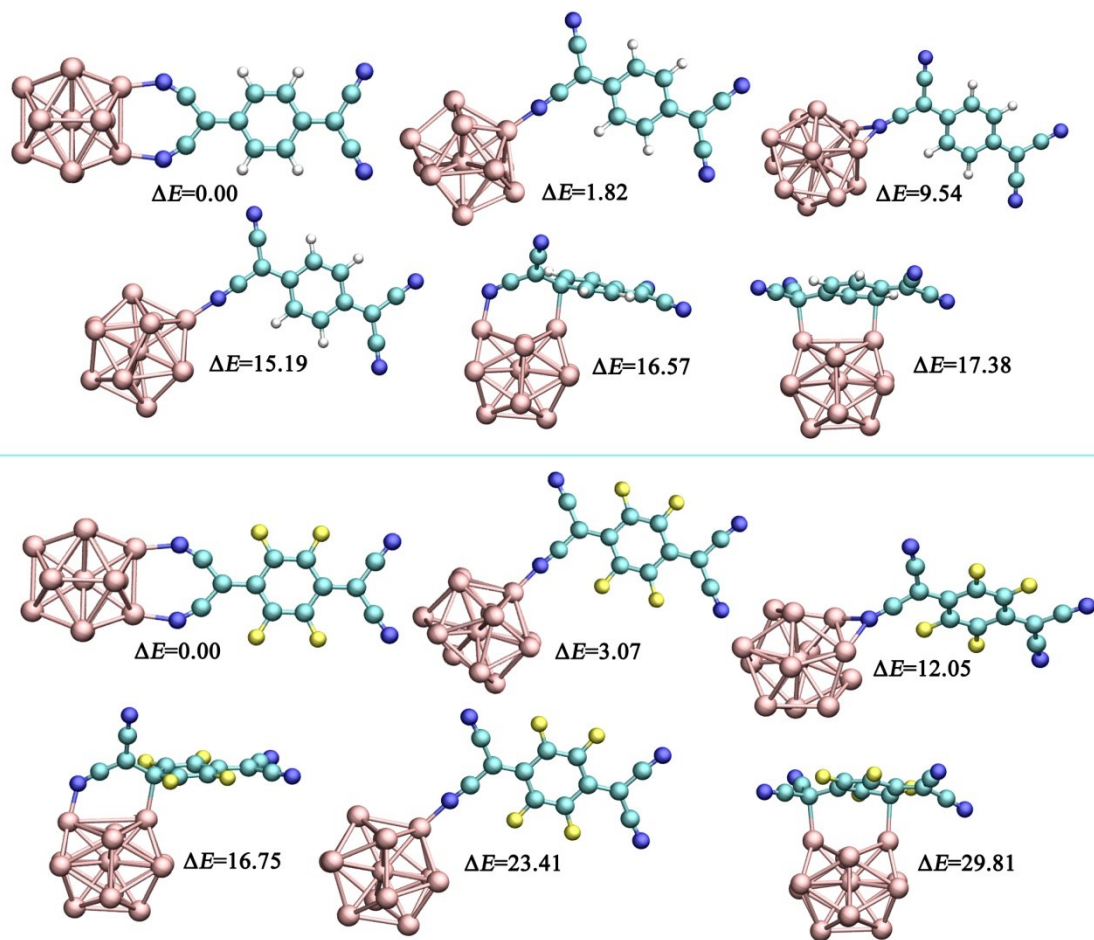

**Fig. S1** Equilibrium structures with relative energy (in kcal mol<sup>-1</sup>) of the Al<sub>13</sub>-TCNQ and Al<sub>13</sub>-F4-TCNQ at the PBE0/6-311G(d) level.

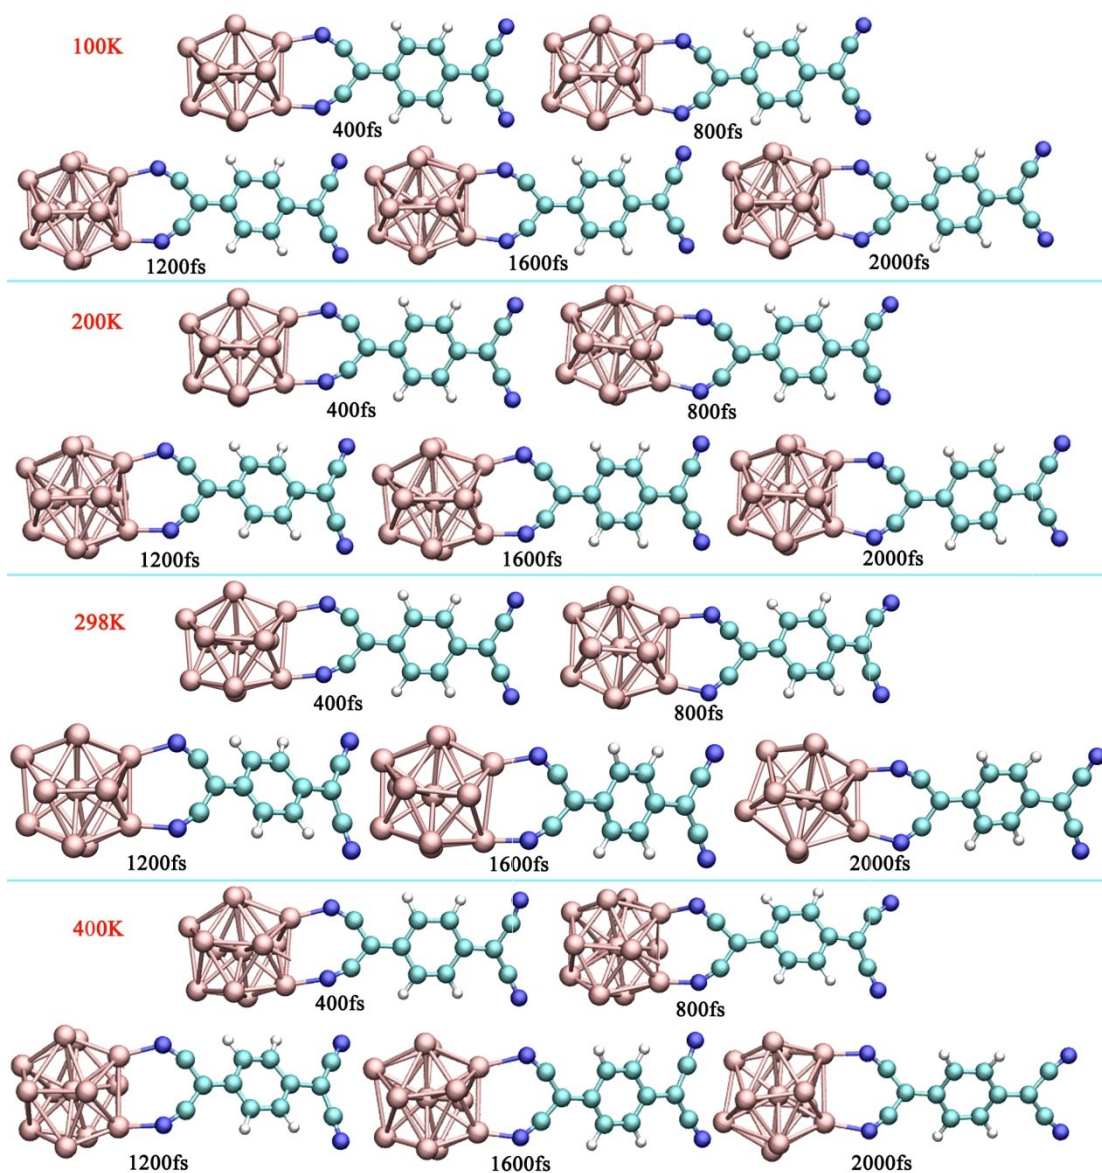

**Fig. S2** Structures of Al<sub>13</sub>-TCNQ at different time intervals during simulations at different temperatures.

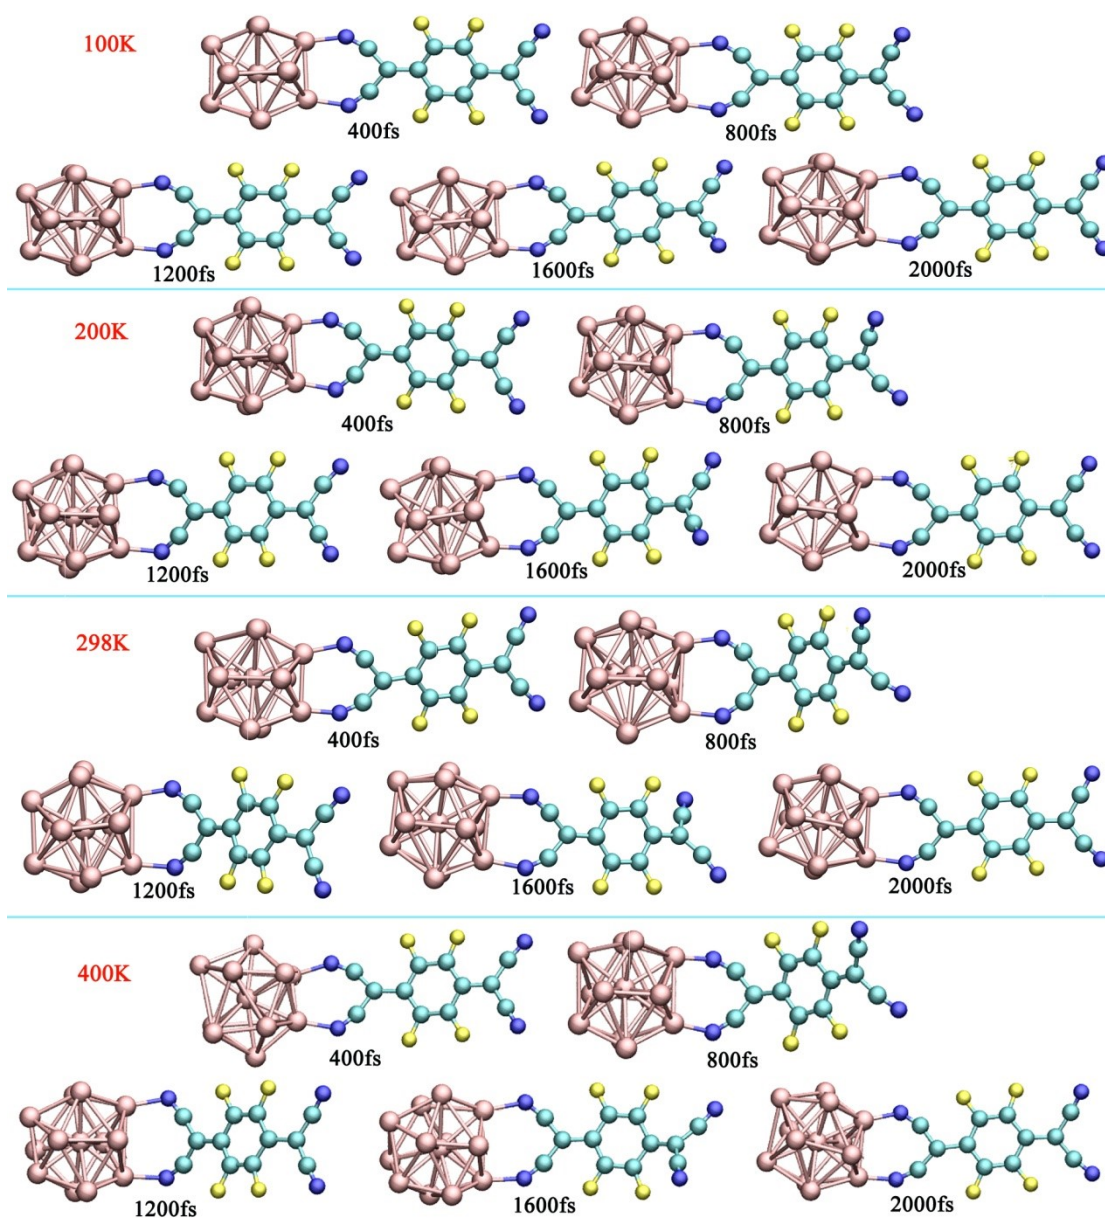

**Fig. S3** Structures of Al<sub>13</sub>-F4-TCNQ at different time intervals during simulations at different temperatures.
